# Supplementary material
Source: HighWire-hosted journal article supplement (https://qualitysafety.bmj.com/content/27/2/148)

**Appendix 1:** Team Familiarity questionnaire


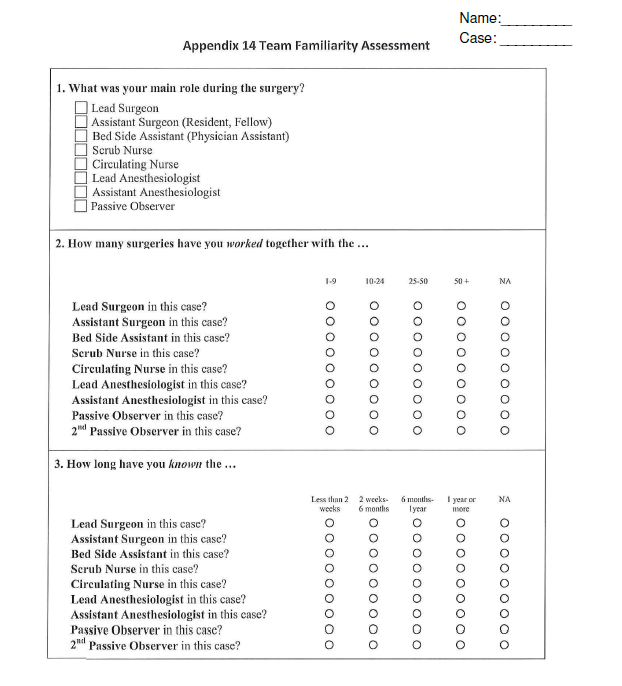

Supplement: inline-supplementary-material-1 [file inline-supplementary-material-1.docx]
